# Supplementary material for: Structure, luminescence properties, and valence-induced spectral behavior of a bismuth-activated garnet phosphor
Source: Royal Society of Chemistry journal article supplement (doi:10.1039/d3tc04039a), 2024-01-01
Supplement: d3tc04039a1.pdf [file d3tc04039a1.pdf]

## Structure, Luminescence Property, and Valence-induced Spectral Behavior in a Bismuth-activated Garnet Phosphor

Gongli Chen,<sup>[ab]</sup> Yonghong Qin,<sup>[ab]</sup> ZhenHua Li,<sup>\*[c]</sup> Xicheng Wang,<sup>\*[ab]</sup> and Yuhua Wang,<sup>\*[ab]</sup>

<sup>[a]</sup>School of Materials and Energy, Lanzhou University, Lanzhou, 730000, China

<sup>[b]</sup>National & Local Joint Engineering Laboratory for Optical Conversion Materials and Technology, & Key Laboratory for Special Function Materials and Structural Design of the Ministry of the Education, Lanzhou University, Lanzhou 730000, China

<sup>[c]</sup>Lanzhou Center for Theoretical Physics & Key Laboratory of Quantum Theory and Applications of MOE, & Key Laboratory of Theoretical Physics of Gansu Province, Lanzhou University, Lanzhou 730000, China

\*E-mail: lizhenhua@lzu.edu.cn, wangxc@lzu.edu.cn, wyh@lzu.edu.cn

**Keywords:** Phosphor; Garnet; Bismuth; Luminescence; DFT calculation.

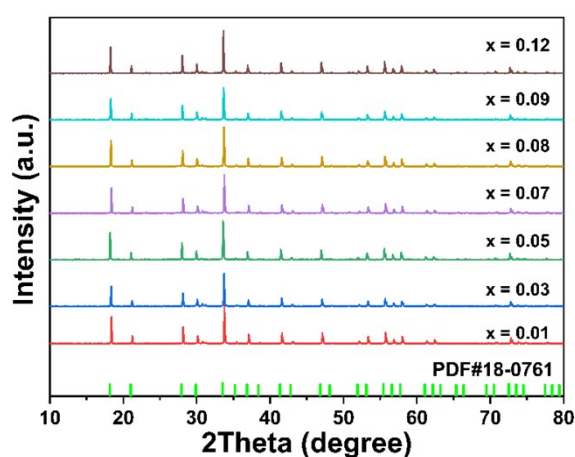

**Figure S1.** the XRD patterns of the LSAS:xBi<sup>3+</sup> ( $0.01 \leq x \leq 0.12$ ) samples; the standard card of Lu<sub>3</sub>Al<sub>5</sub>O<sub>12</sub> (PDF #18-0761) are shown as a reference.

Table S1. Crystallographic data for LSAS

|                               |                                                     |
|-------------------------------|-----------------------------------------------------|
| Formula                       | Lu <sub>2</sub> SrAl <sub>4</sub> SiO <sub>12</sub> |
| Crystal system                | Cubic                                               |
| Space group                   | Iad (No.230)                                        |
| Lattice parameters            |                                                     |
| $a = b = c$ (Å)               | 11.88705(0)                                         |
| $\alpha = \beta = \gamma$ (°) | 90                                                  |
| Cell volume (Å <sup>3</sup> ) | 1276.67(1)                                          |
| $Z$                           | 16                                                  |
| $R$ -factors                  |                                                     |
| $R_{wp}$                      | 0.1037                                              |
| $R_p$                         | 0.0805                                              |
| $\chi^2$                      | 2.131                                               |

Table S2. Atomic coordinates and isotropic displacement parameters for LSAS

| Atom | Wyckoff | S.O.F | $x$        | $y$       | $z$       | Uiso       |
|------|---------|-------|------------|-----------|-----------|------------|
| Al1  | 16a     | 1     | 0          | 0         | 0         | 0.0246     |
| Al2  | 24d     | 0.667 | 3/8        | 0         | 1/4       | 0.0077     |
| Lu1  | 24c     | 0.667 | 0          | 3/4       | 1/8       | 0.0014     |
| O1   | 96h     | 1     | -0.0299(8) | 0.0516(5) | 0.1485(7) | 0.0262     |
| Sr1  | 24c     | 0.333 | 0          | 3/4       | 1/8       | 0.0149(13) |
| Si1  | 24d     | 0.333 | 3/8        | 0         | 1/4       | 0.1276     |

Table S3. Bond distance from Rietveld refinement of LSAS

| Bond  | Distance(Å)  | Bond | Distance(Å)  |
|-------|--------------|------|--------------|
| Al1-O | 1.900(77)×6  | Lu-O | 2.2825(41)×4 |
| Al2-O | 1.7600(20)×4 | Lu-O | 2.3976(81)×4 |
| Sr-O  | 2.2825(41)×4 | Sr-O | 2.3976(81)×4 |
| Si-O  | 1.7600(20)×4 |      |              |

Table S4. Bond valence calculate from Rietveld refinement of LSAS

| Bond type | $R_0$ | $B$  | $V$    |
|-----------|-------|------|--------|
| Lu-O      | 1.971 | 0.37 | 2.9860 |
| Sr-O      | 2.090 | 0.37 | 4.1188 |

$$V_i = \sum_j V_{ij} \quad (S1)$$

$$V_{ij} = \exp\left(\frac{R_0 - R_{ij}}{b}\right) \quad (S2)$$

Where  $V_i$  represents the sum of all valences of the cation  $i$  in the crystal structure,  $V_{ij}$  corresponds to the bond valence between the cation  $i$  and its coordinating anion  $j$ ,  $R_{ij}$  represents the distance between the  $ij$  bonds (values are obtained from the refinement and listed in Table S3), and  $R_0$  is different for the cation, the value of  $b$  is a constant of 0.37.<sup>1</sup>

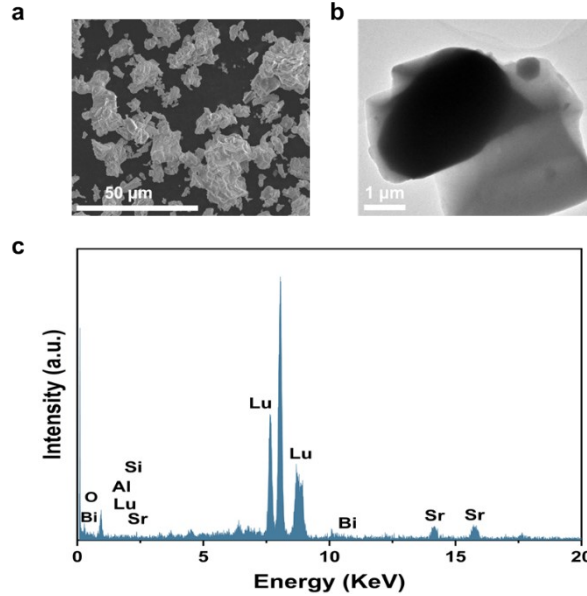

**Figure S2.** (a) the SEM image; (b) TEM image; (c) EDS spectrum of the LSAS: Bi<sup>3+</sup> phosphor

$$I(t) = A_0 + A_1 \exp\left(-\frac{t}{\tau_1}\right) + A_2 \exp\left(-\frac{t}{\tau_2}\right) \quad (\text{S3})$$

where  $I(t)$  represent the luminescence intensity at time  $t$ ,  $A_0$  is the background luminescence intensity,  $A_1$  and  $A_2$  are constants;  $\tau_1$  and  $\tau_2$  are the decay times, respectively.<sup>2</sup>

**Figure S3.**

Table S5. The emission peak, FWHM, lifetime of LSAS: $x\text{Bi}^{3+}$  phosphors

| Bi <sup>3+</sup> concentration ( $x$ ) | Emission peak (nm) | FWHM (nm) | Lifetime (ns) |
|----------------------------------------|--------------------|-----------|---------------|
| 0.01                                   | 459                | 136.67    | 446.06        |
| 0.03                                   | 449                | 136.28    | 442.42        |
| 0.05                                   | 450                | 107.41    | 439.89        |
| 0.07                                   | 451                | 106.96    | 433.62        |
| 0.08                                   | 456                | 109.1     | 428.76        |
| 0.09                                   | 456                | 109.6     | 408.97        |
| 0.12                                   | 453                | 108.7     | 383.35        |

$$(\alpha hv)^n = A(hv - E_g) \quad (S4)$$

$$\alpha = \frac{(1 - R)^2}{2R} \quad (S5)$$

Where  $\alpha$  represents the absorption coefficient,  $hv$  is the incident photon energy.  $A$  is a constant.  $n$  equals 1/2 and 2 for indirect bandgap and direct bandgap, respectively. In this case, the value of  $n$  is 1/2.  $R$  is the reflectivity.<sup>3</sup>

$$MMCT (Bi^{3+}, cm^{-1}) = k_{CN'} [X_{CN}(Bi^{3+}) - \alpha_{CN'}^{CN'} \frac{X_{CN'}(M^{n+})}{d}] \quad (S6)$$

where  $k_{CN'}$  is a constant that is dependent on  $CN'$  (the coordination numbers for the  $Bi^{3+}$  site ( $CN$ ) and for the  $Mn^{n+}$  site ( $CN'$ )),  $X_{CN}(Bi^{3+})$  the electronegativity (EN) of  $Bi^{3+}$ , and  $\alpha_{CN'}^{CN'}$  an adjustable parameter that is dependent on  $CN$  and  $CN'$ .  $X_{CN'}(M^{n+})$  is the electronegativity of the metal cations. The term  $d$  represents the shortest  $Bi^{3+}$ - $Mn^{n+}$  interatomic distances in the host lattices.

$$d = d_{host} + \frac{1}{2}[r(Bi^{3+}) - r(host)] \quad (S7)$$

Where  $d_{host}$  is the shortest distances between the  $Mn^{n+}$  site(s) and the cation site(s) available for  $Bi^{3+}$ ,  $r(Bi^{3+})$  is the ionic radius of the  $Bi^{3+}$  ion and  $r(host)$  is the ionic radius of the host cation that is substituted to  $Bi^{3+}$ .

$X_{CN}(Bi^{3+})$  can be calculated for any value of  $CN$ , following the procedure given in Li and Xue:<sup>4</sup>

$$X_{CN}(Bi^{3+}) = \frac{0.105n^*}{r(Bi^{3+})} \sqrt{\frac{I_m}{13.6}} + 0.863 \quad (S8)$$

where  $n^*$  is the effective principal quantum number (4.36), and  $I_m$  is the ultimate ionization energy (25.56 eV). The  $k_{CN'}$  values were calculated as  $70\,000/X_{CN}(Bi^{3+})$  for  $CN' = 4$  and  $55\,000/X_{CN}(Bi^{3+})$  for  $CN' > 4$ . The  $\alpha_{CN'}^{CN'}$  values were then obtained as  $52\,000/k_{CN'}$  for  $CN = 4$  and as  $45\,500/k_{CN'}$  for  $CN' > 4$ .<sup>5</sup>

In this work, the empirical equation for metal-to-metal charge-transfer (MMCT) state of  $Bi^{3+}$  doped  $Lu_2SrAl_4SiO_{12}$  phosphor can be defined as:

$$MMCT (Bi^{3+}, cm^{-1}) = 55000 - 45500 \frac{X_{CN'}(Lu^{3+})}{d} \quad (S9)$$

$$X_{CN}(Lu^{3+}) = 1.425, d = 3.731 \text{ \AA}, \text{MMCT}(\text{Bi}^{3+}) = 37621.95 \text{ cm}^{-1}.$$

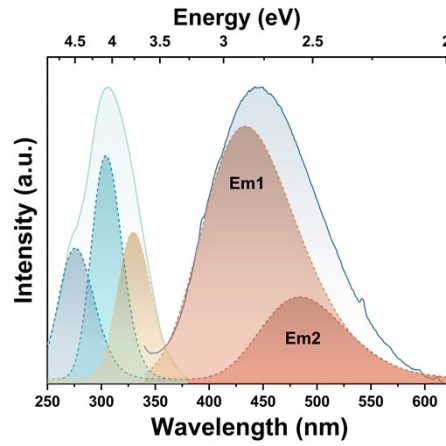

**Figure S3.** Gaussian fitting for PL and PLE spectra of LSAS: 8%Bi<sup>3+</sup>.

$$L(\text{\AA}) = 250 \left( \frac{A}{\rho} \right) \left( \frac{E}{\sqrt{Z}} \right)^n, n = \frac{1.2}{1 - 0.29 \lg Z} \quad (\text{S10})\#$$

where A is the atomic or molecular weight of the material,  $\rho$  is the bulk density, Z is the atomic number or the number of electrons per molecule in the case compounds, and E is the accelerating voltage (kV). For LSAS,  $Z = 144$ ,  $A = 765.63$ ,  $\rho = 6.73 \text{ g/cm}^{-3}$ . So according to the above empirical formula, the estimated electron penetration depth at different accelerating voltage showed in table S5.<sup>6</sup>

**Table S6.** The estimated electron penetration depth for LSAS:Bi<sup>3+</sup> phosphor

| Accelerating voltage (kV) | Penetration depth (nm) |
|---------------------------|------------------------|
| 2                         | 9.01                   |
| 4                         | 83.8                   |
| 6                         | 307.8                  |
| 8                         | 774.6                  |
| 10                        | 1584.6                 |
| 12                        | 2844.1                 |
| 14                        | 4663.4                 |
| 15                        | 5818.7                 |

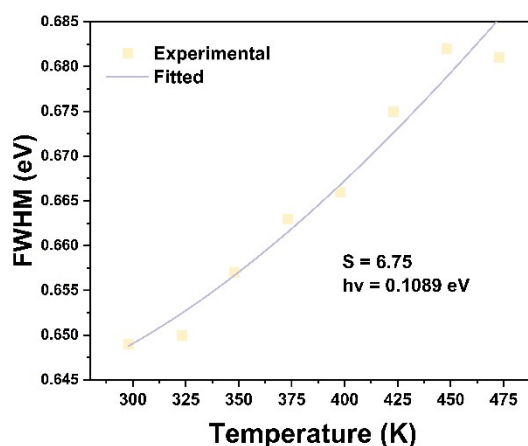

**Figure S4.** Huang–Rhys factor ( $S$ ) and the phonon energy ( $h\nu$ ) obtained through fitting the relationship between FWHM (eV) and  $T$  (K).

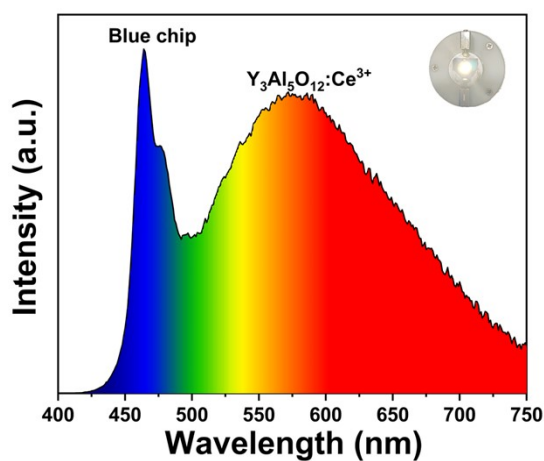

**Figure S5.** electroluminescence spectrum of the WLED device combing blue LED chip with  $Y_3Al_5O_{12}:Ce^{3+}$

## References

1. I. D. Brown, *Chem. Rev.*, 2009, **109**, 6858-6919.
2. J. Z. Mengqiao Li, Jin Han, Zhongxian Qiu, Wenli Zhou, Liping Yu, Zhiqiang Li, Shixun Lian, *Inorg. Chem.*, 2017, **56**, 241-251.
3. Z. Xia, Y. Zhang, M. S. Molokeev and V. V. Atuchin, *J. Phys. Chem. C*, 2013, **117**, 20847-20854.
4. K. L. a. D. Xue, *J. Phys. Chem. A*, 2006, **110**, 11332-11337.
5. P. Boutinaud, *Inorg. Chem.*, 2013, **52**, 6028-6038.
6. D. Geng, G. Li, M. Shang, C. Peng, Y. Zhang, Z. Cheng and J. Lin, *Dalton T.*, 2012, **41**, 3078-3086.
